# Supplementary material for: Evaluation of the Effects of Different Sample Collection Strategies on DNA/RNA Co-Analysis of Forensic Stains
Source: MDPI journal article supplement (doi:10.3390/genes13060983), 2022-05-30
Supplement: s1 [file s1]

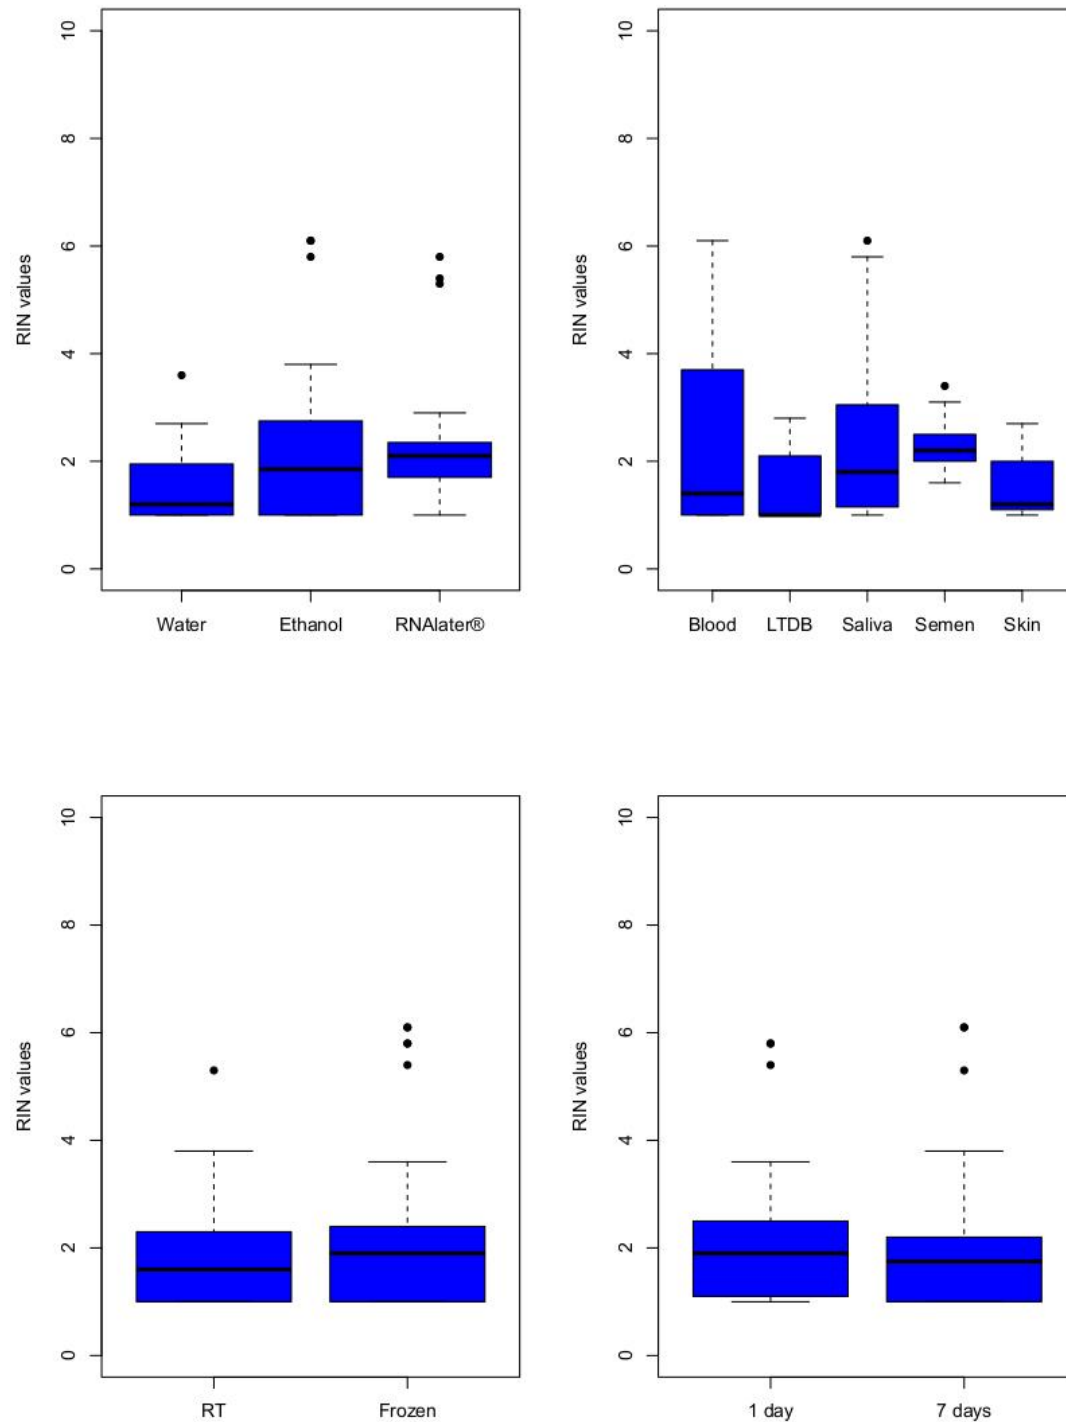

**Figure S1.** Box-and-whisker plots of the RIN values subdivided by moistening agent, tissue type (LTDB: luminol-treated diluted blood), storage temperature (RT: room temperature) and swab storage time before processing.

a)

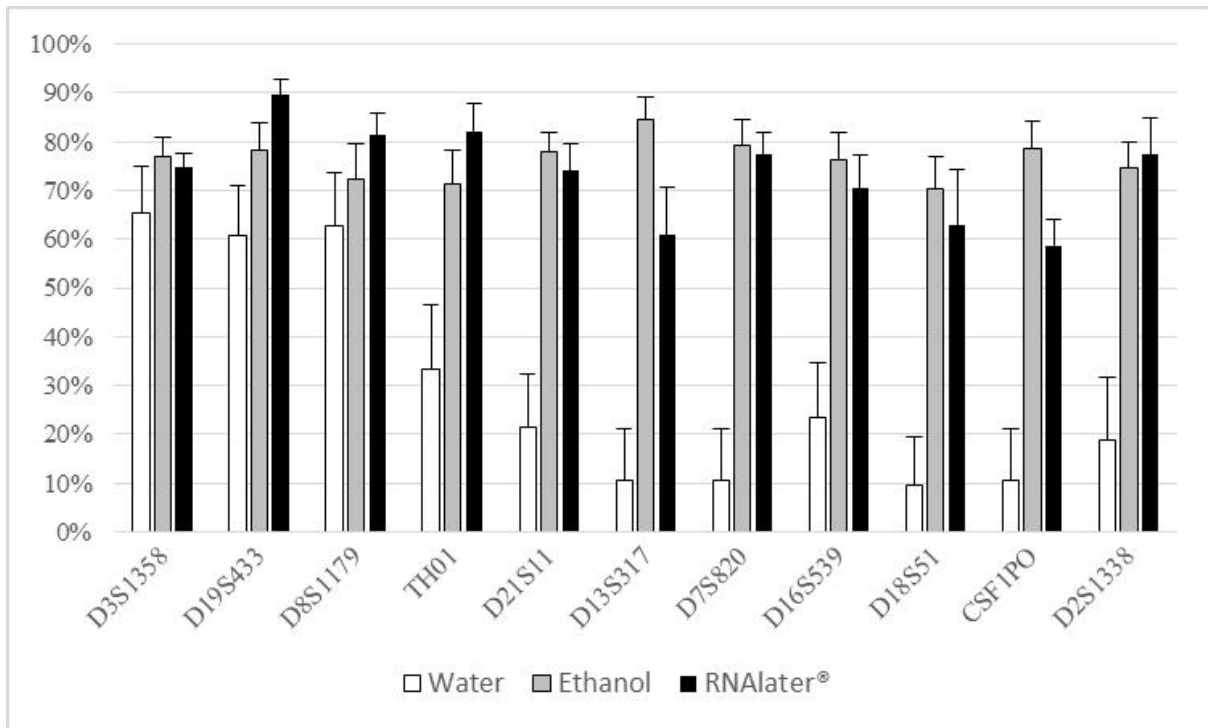

b)

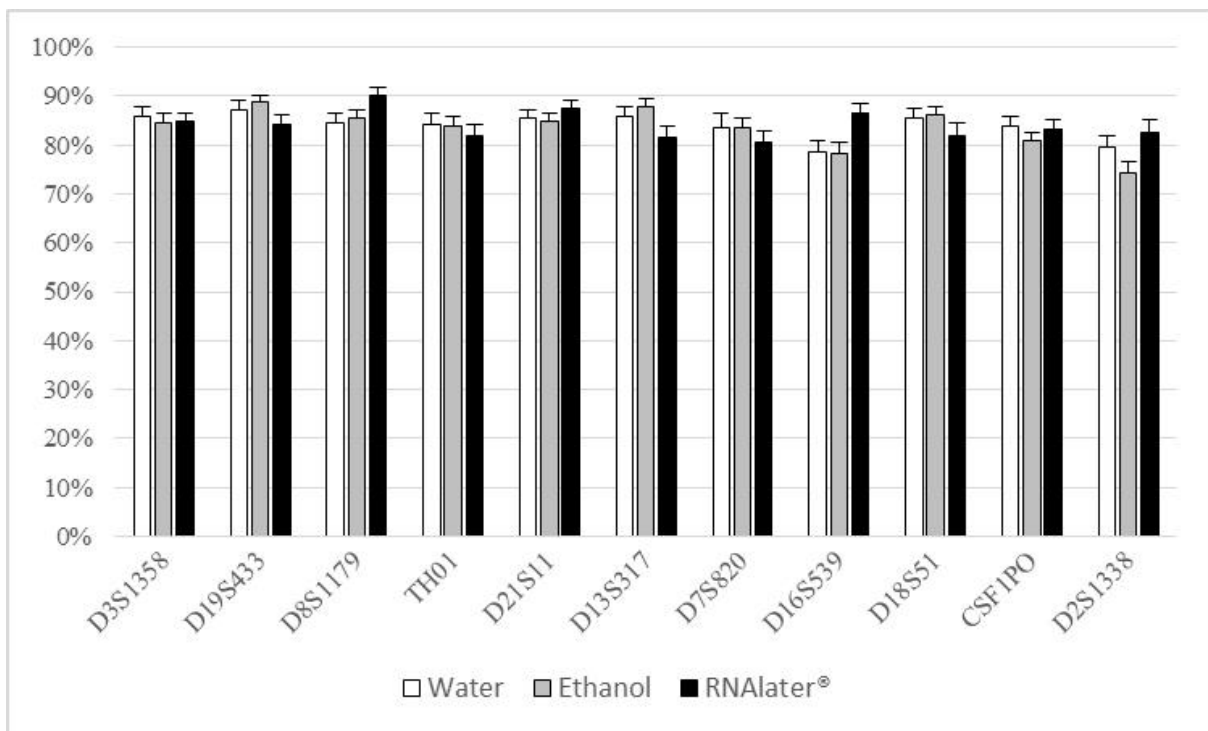

**Figure S2.** Average PHR in skin samples (a) and in tissue samples other than skin (b) treated with different moistening agents (whiskers indicate standard errors). STR markers with heterozygous genotype in the DNA profile of the donor are shown and listed according to amplicon size. PHR = 0% was assumed for loci with one of the two alleles below the analytical threshold (50 rfu).

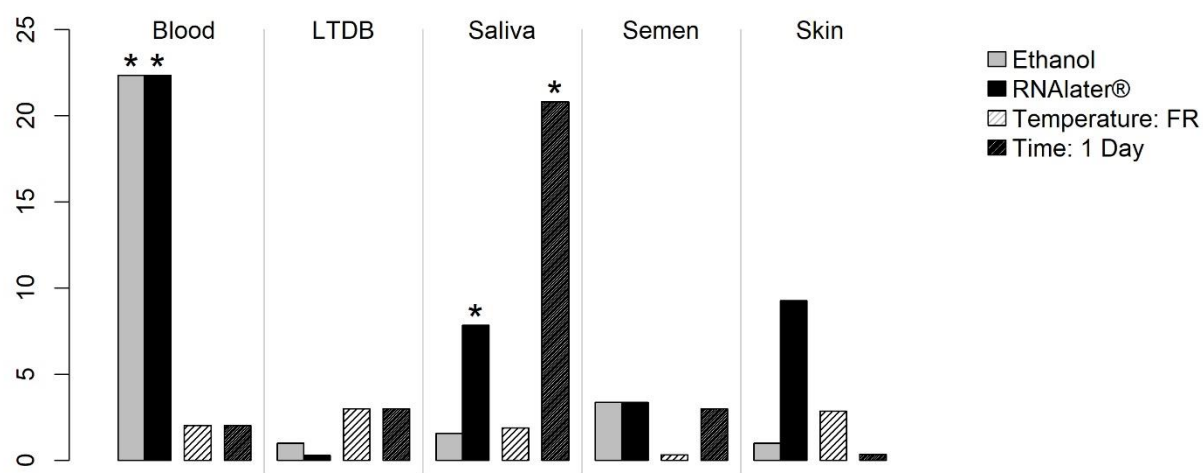

**Figure S3.** Odds ratios (ORs) reported on the y-axis indicate how much more likely it was to "observe" the expected tissues in the mRNA profiling experiments when alternative swabbing procedures were adopted instead of the standard procedure (i.e. swabs moistened with water and stored at room temperature for 7 days before extraction). Significant p-values are marked with an asterisk. LTDB: luminol-treated diluted blood.

**Table S1.** Generalized log-gamma regression coefficients represent the mean increase, or decrease, in DNA and RNA concentrations on a log scale due to the term, compared to the standard procedure (i.e. swabs moistened with water and stored at room temperature for 7 days before extraction).

| Term                                 | DNA concentration   |              |              |         | RNA concentration   |              |              |         |
|--------------------------------------|---------------------|--------------|--------------|---------|---------------------|--------------|--------------|---------|
|                                      | Coefficient $\beta$ | lower 95% CI | upper 95% CI | p-value | Coefficient $\beta$ | lower 95% CI | upper 95% CI | p-value |
| <b>Blood</b>                         |                     |              |              |         |                     |              |              |         |
| Ethanol                              | -2.696              | -3.453       | -1.938       | 0.000   | -1.765              | -3.466       | -0.093       | 0.015   |
| RNAlater®                            | -1.196              | -1.947       | -0.445       | 0.005   | 0.046               | -1.375       | 1.462        | 0.945   |
| Frozen                               | -0.137              | -0.747       | 0.474        | 0.660   | -0.119              | -1.235       | 1.000        | 0.826   |
| 1Day                                 | -0.001              | -0.613       | 0.613        | 1.000   | 1.650               | 0.273        | 2.997        | 0.006   |
| <b>Luminol-treated diluted blood</b> |                     |              |              |         |                     |              |              |         |
| Ethanol                              | -0.049              | -0.419       | 0.322        | 0.799   | 1.133               | 0.489        | 1.774        | 0.002   |
| RNAlater®                            | 0.248               | -0.123       | 0.619        | 0.204   | 3.711               | 3.088        | 4.332        | 0.000   |
| Frozen                               | 0.371               | 0.068        | 0.674        | 0.026   | 0.360               | -0.146       | 0.869        | 0.176   |
| 1Day                                 | -0.135              | -0.438       | 0.169        | 0.393   | 0.200               | -0.360       | 0.751        | 0.444   |
| <b>Saliva</b>                        |                     |              |              |         |                     |              |              |         |
| Ethanol                              | -0.522              | -0.952       | -0.091       | 0.027   | 0.135               | -0.555       | 0.804        | 0.701   |
| RNAlater®                            | 0.119               | -0.315       | 0.552        | 0.593   | 0.585               | -0.110       | 1.267        | 0.119   |
| Frozen                               | 1.023               | 0.661        | 1.384        | 0.000   | -0.693              | -1.231       | -0.150       | 0.024   |
| 1Day                                 | 0.152               | -0.207       | 0.511        | 0.403   | 2.045               | 1.481        | 2.595        | 0.000   |
| <b>Semen</b>                         |                     |              |              |         |                     |              |              |         |
| Ethanol                              | -0.755              | -1.177       | -0.333       | 0.002   | 0.949               | -0.018       | 1.897        | 0.058   |
| RNAlater®                            | 0.008               | -0.417       | 0.433        | 0.972   | 1.772               | 0.732        | 2.814        | 0.002   |
| Frozen                               | -0.254              | -0.601       | 0.092        | 0.157   | -0.076              | -0.904       | 0.756        | 0.846   |
| 1Day                                 | 0.139               | -0.204       | 0.483        | 0.430   | -1.002              | -1.892       | -0.136       | 0.019   |
| <b>Skin</b>                          |                     |              |              |         |                     |              |              |         |
| Ethanol                              | 1.779               | 0.606        | 2.955        | 0.004   | -0.251              | -0.895       | 0.385        | 0.443   |
| RNAlater®                            | 1.578               | 0.338        | 2.848        | 0.010   | 1.420               | 0.785        | 2.046        | 0.000   |
| Frozen                               | -0.312              | -1.351       | 0.698        | 0.521   | 0.066               | -0.525       | 0.660        | 0.818   |
| 1Day                                 | -0.679              | -1.682       | 0.359        | 0.171   | -0.433              | -1.028       | 0.174        | 0.141   |

**Table S2.** Logistic regression ORs indicating the likelihood of “observing”, rather than “not observing”, the expected tissue in the mRNA profiling experiments due to the term, compared to the standard procedure (i.e. swabs moistened with water and stored at room temperature for 7 days before extraction).

| Term                                 | OR     | lower 95% CI | upper 95% CI | p-value |
|--------------------------------------|--------|--------------|--------------|---------|
| <b>Blood</b>                         |        |              |              |         |
| Ethanol                              | 22.35  | 1.884        | 3288.25      | 0.01    |
| RNAlater®                            | 22.35  | 1.884        | 3288.25      | 0.01    |
| Frozen                               | 2.03   | 0.192        | 32.56        | 0.554   |
| 1 Day                                | 2.03   | 0.192        | 32.56        | 0.554   |
| <b>Luminol-treated diluted blood</b> |        |              |              |         |
| Ethanol                              | 1.000  | 0.005        | 195.918      | 1.000   |
| RNAlater®                            | 0.298  | 0.002        | 6.404        | 0.447   |
| Frozen                               | 3.009  | 0.160        | 448.967      | 0.469   |
| 1 Day                                | 3.009  | 0.160        | 448.967      | 0.469   |
| <b>Saliva</b>                        |        |              |              |         |
| Ethanol                              | 1.571  | 0.242        | 10.967       | 0.434   |
| RNAlater®                            | 7.857  | 1.020        | 102.436      | 0.048   |
| Frozen                               | 1.889  | 0.395        | 9.697        | 0.635   |
| 1Day                                 | 20.810 | 3.165        | 253.10       | <0.001  |
| <b>Semen</b>                         |        |              |              |         |
| Ethanol                              | 3.360  | 0.156        | 538.702      | 0.447   |
| RNAlater®                            | 3.360  | 0.156        | 538.702      | 0.447   |
| Frozen                               | 0.332  | 0.002        | 6.255        | 0.469   |
| 1 Day                                | 3.009  | 0.160        | 448.967      | 0.469   |
| <b>Skin</b>                          |        |              |              |         |
| Ethanol                              | 1.000  | 0.112        | 8.920        | 1.000   |
| RNAlater®                            | 9.273  | 0.526        | 1561.442     | 0.140   |
| Frozen                               | 2.849  | 0.367        | 36.234       | 0.325   |
| 1 Day                                | 0.351  | 0.028        | 2.725        | 0.325   |

**Table S3.** Generalized log-gamma regression coefficients represent the mean increase, or decrease, in the peak height (rfu) of the tissue-specific mRNA markers and the housekeeping genes due to the term, compared to the standard procedure (i.e. swabs moistened with water and stored at room temperature for 7 days before extraction).

| Term                                 | Tissue specific mRNA markers |              |              |         | Housekeeping genes  |              |              |         |
|--------------------------------------|------------------------------|--------------|--------------|---------|---------------------|--------------|--------------|---------|
|                                      | Coefficient $\beta$          | lower 95% CI | upper 95% CI | p-value | Coefficient $\beta$ | lower 95% CI | upper 95% CI | p-value |
| <b>Blood</b>                         |                              |              |              |         |                     |              |              |         |
| Ethanol                              | 0.989                        | 0.372        | 1.612        | 0.002   | 0.787               | 0.324        | 1.251        | 0.002   |
| RNAlater®                            | 1.279                        | 0.665        | 1.900        | <0.001  | 1.130               | 0.671        | 1.590        | <0.001  |
| Frozen                               | 0.599                        | 0.093        | 1.114        | 0.018   | 0.282               | -0.094       | 0.659        | 0.140   |
| 1Day                                 | 0.293                        | -0.172       | 0.758        | 0.221   | 0.109               | -0.255       | 0.475        | 0.557   |
| <b>Luminol-treated diluted blood</b> |                              |              |              |         |                     |              |              |         |
| Ethanol                              | -0.005                       | -0.285       | 0.274        | 0.970   | -0.130              | -0.430       | 0.170        | 0.405   |
| RNAlater®                            | 0.999                        | 0.720        | 1.277        | <0.001  | 0.955               | 0.653        | 1.258        | <0.001  |
| Frozen                               | 0.102                        | -0.126       | 0.330        | 0.387   | 0.105               | -0.140       | 0.349        | 0.411   |
| 1Day                                 | 0.187                        | -0.039       | 0.414        | 0.121   | -0.140              | -0.387       | 0.107        | 0.275   |
| <b>Saliva</b>                        |                              |              |              |         |                     |              |              |         |
| Ethanol                              | 0.702                        | -0.118       | 1.515        | 0.084   | 0.828               | 0.163        | 1.486        | 0.020   |
| RNAlater®                            | 2.205                        | 1.423        | 2.978        | <0.001  | 1.647               | 0.928        | 2.361        | <0.001  |
| Frozen                               | 0.144                        | -0.493       | 0.775        | 0.648   | 0.379               | -0.155       | 0.912        | 0.163   |
| 1Day                                 | 2.746                        | 2.099        | 3.388        | <0.001  | 2.029               | 1.452        | 2.602        | <0.001  |
| <b>Semen</b>                         |                              |              |              |         |                     |              |              |         |
| Ethanol                              | 0.781                        | 0.604        | 0.959        | <0.001  | 0.924               | 0.762        | 1.087        | <0.001  |
| RNAlater®                            | 0.905                        | 0.727        | 1.082        | <0.001  | 0.958               | 0.796        | 1.120        | <0.001  |
| Frozen                               | 0.155                        | 0.011        | 0.300        | 0.049   | 0.114               | -0.018       | 0.247        | 0.107   |
| 1Day                                 | -0.039                       | -0.184       | 0.106        | 0.606   | 0.015               | -0.118       | 0.147        | 0.829   |
| <b>Skin</b>                          |                              |              |              |         |                     |              |              |         |
| Ethanol                              | 0.451                        | -0.219       | 1.121        | 0.203   | 0.598               | 0.267        | 0.929        | 0.002   |
| RNAlater®                            | 0.870                        | 0.200        | 1.541        | 0.020   | 0.610               | 0.279        | 0.279        | 0.002   |
| Frozen                               | 0.216                        | -0.331       | 0.763        | 0.449   | 0.172               | -0.097       | 0.443        | 0.225   |
| 1Day                                 | -1.083                       | -1.630       | -0.535       | 0.001   | -0.319              | -0.589       | -0.049       | 0.030   |
